# Supplementary material
Source: PubMed Central journal article supplement (PMC7966580)
Supplement: 3872_table.pdf [file 3872_table.pdf]

**On-line Table: Demographic features, type and location of clefts, and associated anomalies of subjects with schizencephaly**

| Subject | Fetal Sex | Prenatal US Reason for MRI Referral | Fetal MRI Age (wk) | Postnatal MRI Age (mo) | No. of Clefts | Prenatal Type of Cleft | Postnatal Type of Cleft | Location   | Associated Anomalies on Prenatal MRI                                                             | Associated Anomalies on Postnatal MRI                                            |
|---------|-----------|-------------------------------------|--------------------|------------------------|---------------|------------------------|-------------------------|------------|--------------------------------------------------------------------------------------------------|----------------------------------------------------------------------------------|
| 1       | M         | Holoprosencephaly                   | 22                 | 15                     | 2             | R: open                | R: closed               | PT         | Absence of septum                                                                                | Absence of septum, optic nerve hypoplasia                                        |
| 2       | F         | Ventriculomegaly                    | 30                 | 0.03                   | 2             | L: open<br>L: open     | L: closed<br>R: closed  | FP<br>FP   | Contralateral subependymal heterotopia, ACC, coloboma, PMG along the clefts                      | Bilateral subependymal heterotopia, absence of septum, ACC, coloboma             |
| 3       | F         | ACC and absent cavum                | 22                 | 20                     | 2             | L: closed<br>R: closed | L: closed<br>R: closed  | FP<br>PT   | Absence of septum                                                                                | Absence of septum                                                                |
| 4       | F         | Ventriculomegaly                    | 35                 | 0.1                    | 2             | L: open<br>R: open     | L: open<br>R: open      | FPT<br>OPT | None                                                                                             | None                                                                             |
| 5       | M         | Ventriculomegaly                    | 27                 | 4                      | 2             | L: open<br>R: open     | L: open<br>R: open      | OPT<br>FPT | Absence of septum                                                                                | Absence of septum, mild bilateral optic nerve hypoplasia, PMG outside the clefts |
| 6       | F         | Cyst in the brain                   | 32                 | 0.7                    | 1             | L: open<br>L: open     | L: open<br>L: open      | FPT<br>FPT | Absence of septum, PMG along the cleft, and outside cleft (ipsilateral and contralateral) cortex | Absence of septum, PMG outside cleft (ipsilateral and contralateral)             |
| 7       | M         | Holoprosencephaly                   | 28                 | 85                     | 2             | R: closed<br>L: open   | R: closed<br>L: closed  | FP<br>FP   | Absence of septum                                                                                | Absence of septum                                                                |
| 8       | M         | Absent cavum                        | 29                 | 1                      | 1             | L: open                | L: open                 | FT         | Absence of septum, contralateral PMG                                                             | Absence of septum, mild optic nerve hypoplasia, PMG in contralateral cortex      |
| 9       | F         | Cyst in the brain                   | 26                 | 2                      | 2             | R: open<br>L: open     | R: closed<br>L: closed  | T<br>P     | Partial absence of septum (posterior)                                                            | Partial absence of septum                                                        |
| 10      | F         | Holoprosencephaly                   | 25                 | 0.03                   | 2             | R: open<br>R: open     | R: closed<br>R: open    | FP<br>FP   | Absence of septum                                                                                | Absence of septum                                                                |

**Note:**—R indicates right; L, left; F, frontal; O, occipital; P, parietal; T, temporal; ACC, agenesis of the corpus callosum; PMG, polymicrogyria; US, ultrasound.
